# Supplementary material for: Identification of Prognostic Model Based on Immune-Related LncRNAs in Stage I-III Non-Small Cell Lung Cancer
Source: Front Oncol. 2021 Oct 20;11:706616. doi: 10.3389/fonc.2021.706616 (PMC8564147; doi:10.3389/fonc.2021.706616)
Supplement: Supplementary file 10 [file Table_3.xlsx]

## Sheet: Sheet1
Supplemental Table 3 Primer sequences
CDC42.IT1	F primer (5′-3′)	ATTCTCCTGCCTCCACCTCC
	R primer (5′-3′)	ATGCCAAGTCTGTATTTCACCTAAG
LIN01116	F primer (5′-3′)	ATGAACGCTTTTGAATATGGGG
	R primer (5′-3′)	GTCAGTTACAGCATGATGGGGAT
WWWC2.AS2	F primer (5′-3′)	TAGGCTTTGCGCTTGGTGAA
	R primer (5′-3′)	ATTGTAGGCAGGTCCCATCTTTT
CASC15	F primer (5′-3′)	CCAGCAGAATTACCTGAGACGAG
	R primer (5′-3′)	GAAACAGACAATGGAGAACAGCC
BANCR	F primer (5′-3′)	TTTGAGCCTTGCCAGTTCCAT
	R primer (5′-3′)	TCATCCCTCCCTCTTGTTTCTTC
COLCA1	F primer (5′-3′)	ATGTTTGCCCTGAAGTCCTGATA
	R primer (5′-3′)	GGAACAGGCTGCCTCACAAATAG
RPARP-AS1	F primer (5′-3′)	TGTAATCACAAGGGTCCTTAACTG
	R primer (5′-3′)	TGGCTGGTTAAGTCTTTCAGTCATT
RPKG1-AS1	F primer (5′-3′)	GTAGATGAACTTGATTAGGCAGACG
	R primer (5′-3′)	AGAAGCAAAGAGGCCAGTAGAAA
HOTAIR	F primer (5′-3′)	AATGGAACGGATTTAGAAGCCTG
	R primer (5′-3′)	GGTCTTGTAAACATCAGACTCTTTGG
TMPO.AS1	F primer (5′-3′)	ACCTCCACGCTATTAACCCCAA
	R primer (5′-3′)	CATGGTTTAGTCCAAGCAAGGC
CANDE	F primer (5′-3′)	GGAGGAGATTCTGAAGATAAGGAGG
	R primer (5′-3′)	TCAACATTTCCAGTGGCATCC
C20orf197	F primer (5′-3′)	AAATCGCGTGGACTGCAACA
	R primer (5′-3′)	CTCTGTTCCTGGCTTGCTTCTG
CSNK1G2.AS1	F primer (5′-3′)	AGGAGTGAACGCCAGGGATG
	R primer (5′-3′)	TTGCTGATGGCGACCTGTGA
LINC00896	F primer (5′-3′)	GGCAGTCATCGTGTTGGGTTT
	R primer (5′-3′)	TGGAGGACGAGTGGATTAGACG
LIN00528	F primer (5′-3′)	CACGCATTTATCTCCGCCTTC
	R primer (5′-3′)	GCTCAGAACAGAAGGTGGAAAGG
GADPH	F primer (5′-3′)	GGAAGCTTGTCATCAATGGAAATC
	R primer (5′-3′)	TGATGACCCTTTTGGCTCCC
